# Supplementary material
Source: Springer Nature journal article supplement (https://www.springerprofessional.de/resource/supplementary/13638_2013_898_MOESM3_ESM.pdf/11899176)

$N = 10$ 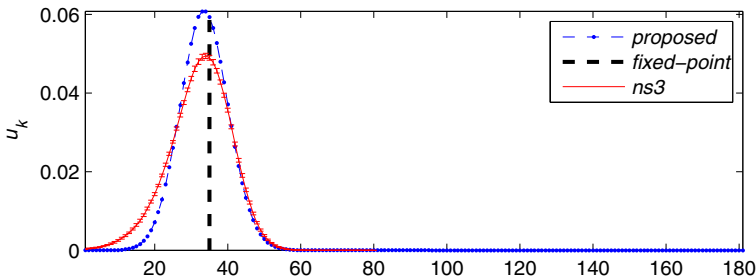 $N = 20$ 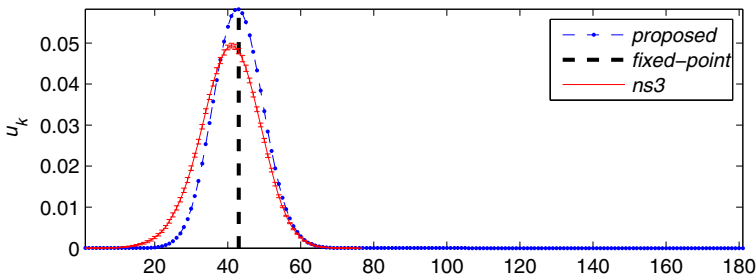 $N = 30$ 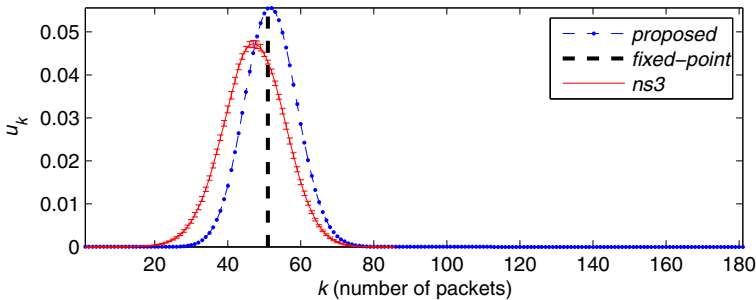

Supplement: MOESM3 [file 11899176]
